# Supplementary material for: Gelatin-Based Biofilms with FexOy-NPs Incorporated for Antioxidant and Antimicrobial Applications
Source: MDPI journal article supplement (doi:10.3390/ma15051966), 2022-03-07
Supplement: s1 [file s1]

SUPPLEMENTARY MATERIALS

# Gelatin-Based Biofilms with $\text{Fe}_x\text{O}_y$ -NPs Incorporated for Antioxidant and Antimicrobial Applications

Johar Amin Ahmed Abdullah <sup>1,\*</sup>, Mercedes Jiménez-Rosado <sup>1</sup>, Antonio Guerrero <sup>1</sup> and Alberto Romero <sup>2</sup>

<sup>1</sup> Departamento de Ingeniería Química, Escuela Politécnica Superior, Universidad de Sevilla, 41011 Sevilla, Spain; mjimenez42@us.es (M.J.-R.); aguerrero@us.es (A.G.)

<sup>2</sup> Departamento de Ingeniería Química, Facultad de Física, Universidad de Sevilla, 41012 Sevilla, Spain; alromero@us.es

\* Correspondence: jabdullah@us.es; Tel.: +34-95-455-7179

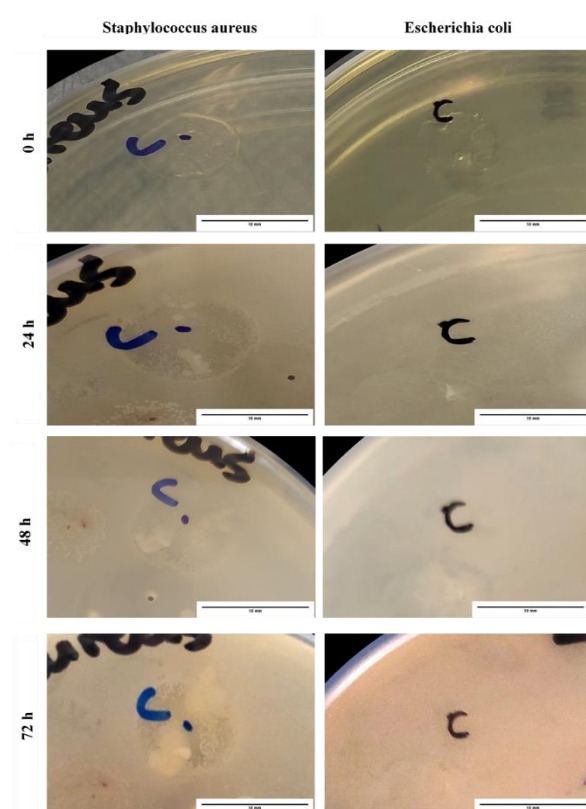

**Figure S1:** Image of inhibition area over time of Neat gelatin-based biofilm without  $\text{Fe}_x\text{O}_y$ -NPs incorporated.

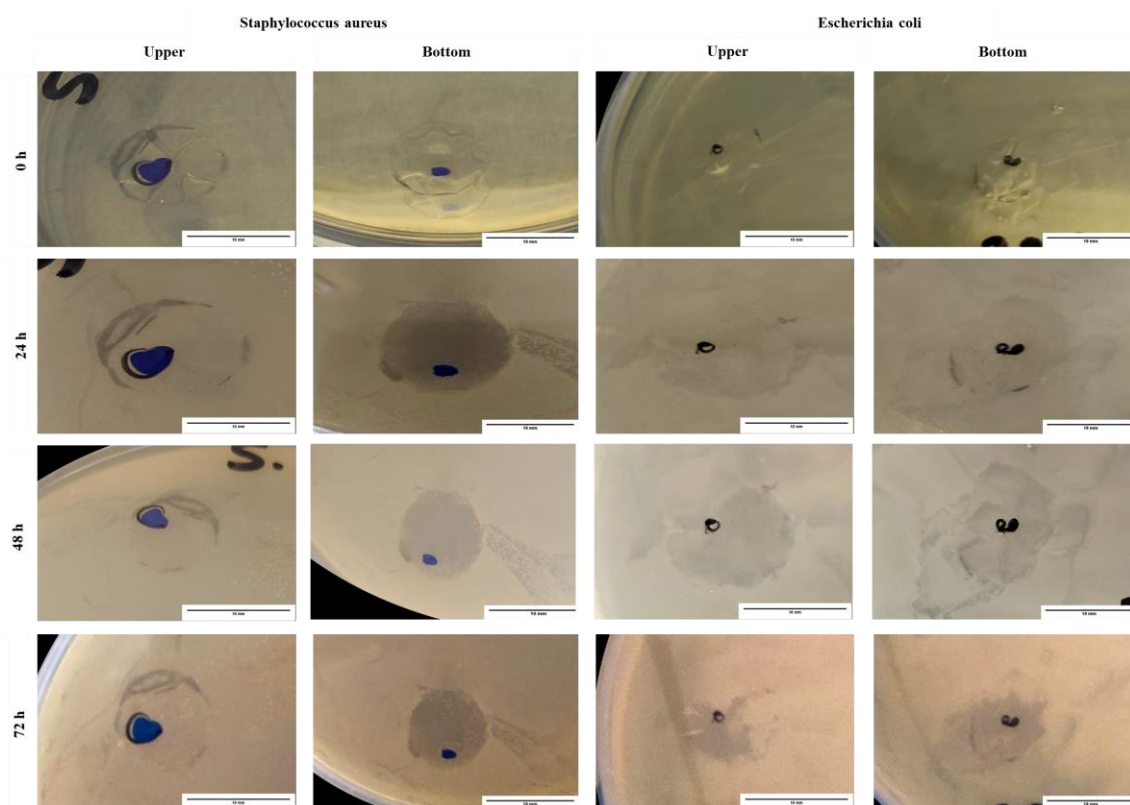

**Figure S2:** Image of inhibition area over time of gelatin-based biofilm with 1.0 % GS Fe<sub>3</sub>O<sub>4</sub>-NPs incorporated.

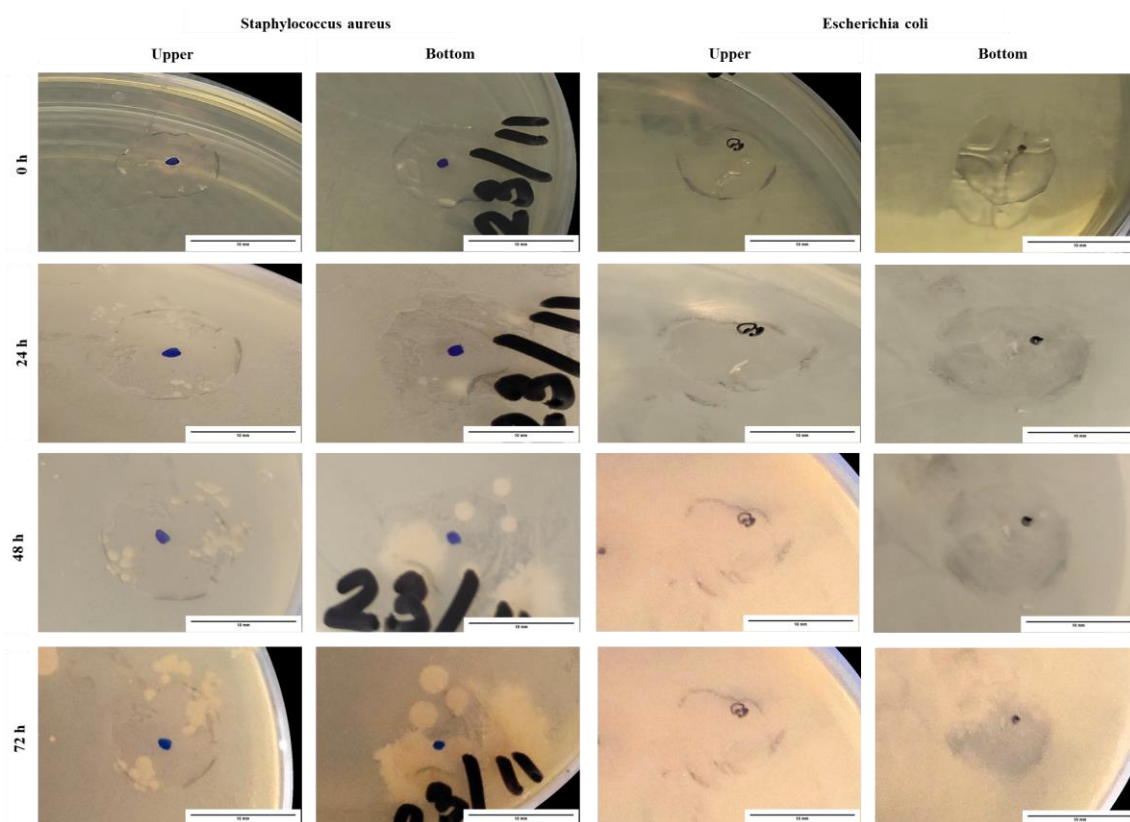

**Figure S3:** Image of inhibition area over time of gelatin-based biofilm with 1.0 % CS Fe<sub>3</sub>O<sub>4</sub>-NPs incorporated.
